# Supplementary material for: Trapping and delivery of Escherichia coli in a microfluidic channel using an optical nanofiber
Source: Royal Society of Chemistry journal article supplement (doi:10.1039/c3nr02088f), 2013-01-01
Supplement: c3nr02088f.pdf [file c3nr02088f.pdf]

## Supplementary Information

### Trapping and delivery of *Escherichia coli* in a microfluidic channel using an optical nanofiber

Hongbao Xin, Chang Cheng and Baojun Li\*

State Key Laboratory of Optoelectronic Materials and Technologies, School of Physics and Engineering, Sun Yat-Sen University, Guangzhou 510275, China

\*[stslbj@outlook.com](mailto:stslbj@outlook.com)

#### 1. Relationship between the trapping region length of the NF and launched optical power

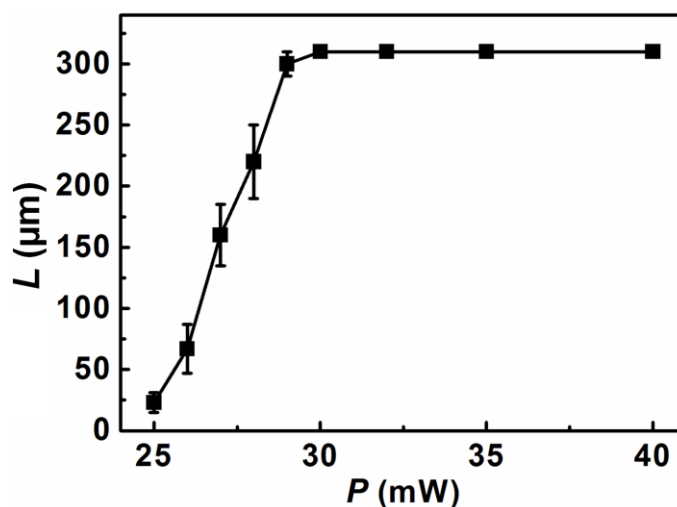

Fig. S1. Trapping region length ( $L$ ) along the NF as a function of launched optical power ( $P$ ),  $L$  is measured from the beginning of the NF (diameter: 600 nm, length: 310  $\mu\text{m}$ ) near the laser input end.

#### 2. Relationship between the maximum delivery distance and launched optical power

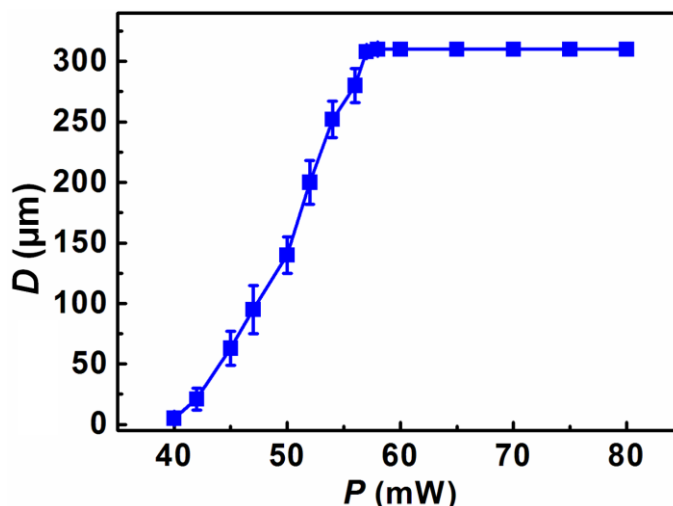

Fig. S2. Maximum delivery distance ( $D$ ) of the *E. coli* along the NF as a function of launched optical power ( $P$ ),  $D$  is measured for an *E. coli* trapped at the beginning of the NF (diameter: 600 nm, length: 310  $\mu\text{m}$ ) near the laser input end.
